# Supplementary material for: Mechanisms of peptide sex pheromone regulation of conjugation in Enterococcus faecalis
Source: PubMed Central journal article supplement (PMC5552905; doi:10.1002/mbo3.492), 2017-05-19

## Supplementary Information for Chen et al., “Direct Effects of Peptide Sex Pheromones...”

Supplementary Figure 1. Binding and dissociation curves of I and C peptides to PrgX as determined by Biacore Surface plasmon resonance. Solutions of I or C peptides at the indicated concentrations (nM) were flowed over a bound sample of PrgX, as described in the methods. A. Sample binding curve for C. B. Sample binding curve for I. The complete raw data file from these experiments is available from the corresponding author on request.

S1A.

Sensorgram: 'cCF10 Fc2-1'

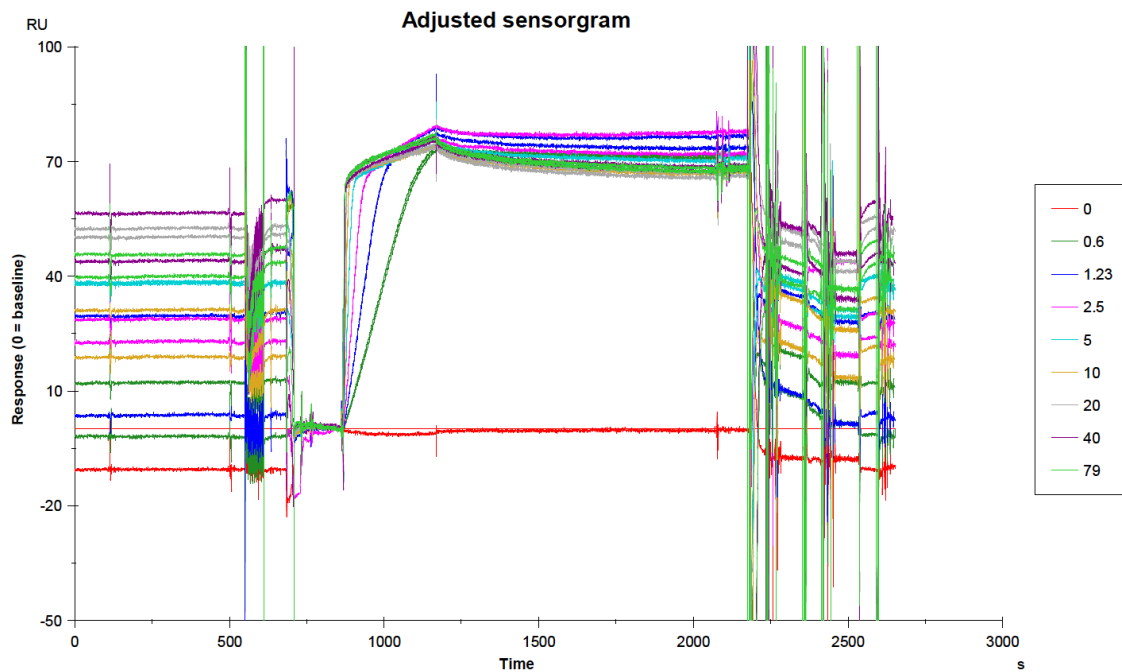

S1B.

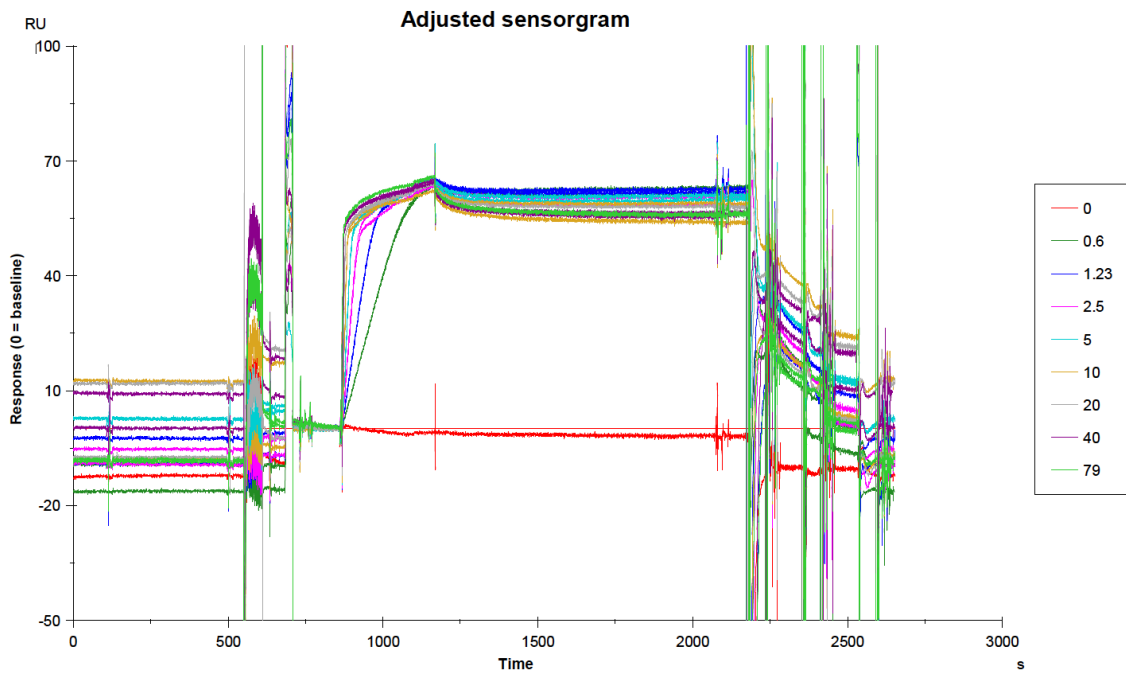

Supplementary Figure 2. Binding polynomial fitting used to calculate  $K_D$  values for PrgX binding to XBS sites of pCF10. As described in the main text, densitometric analysis of EMSAs similar to those shown in Fig. 7 were used to generate curves.

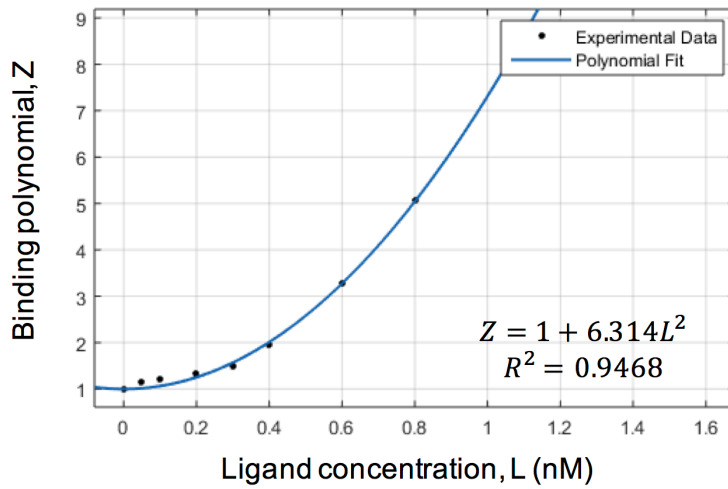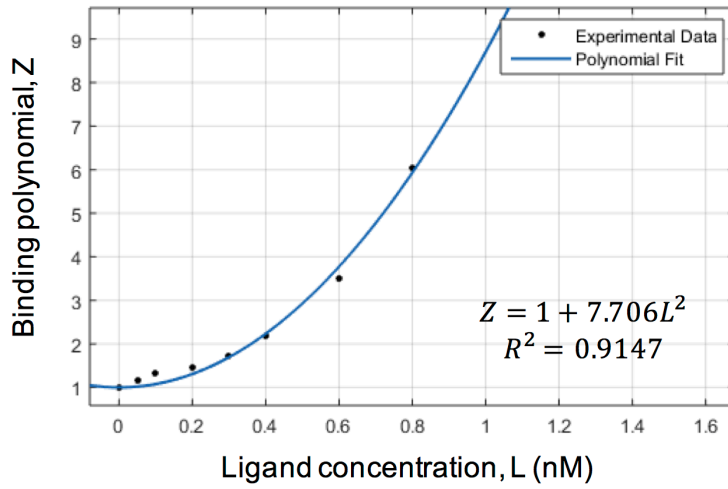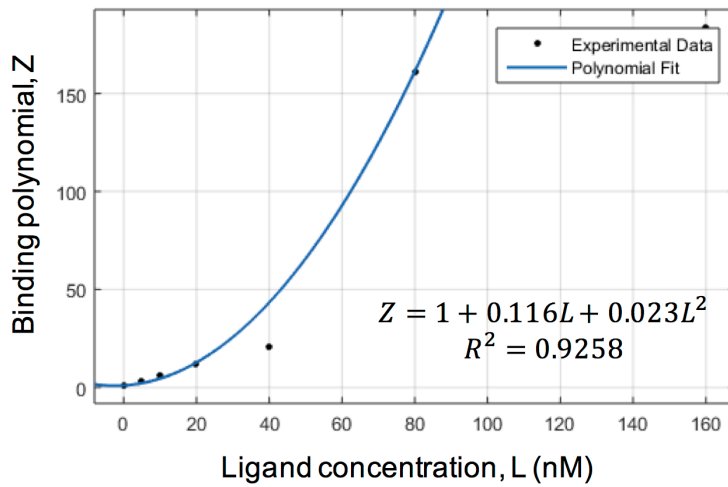

**Figure S3.** EMSA assays were performed using 8 fmol of digoxigenin-labeled LT DNA probes with increasing amounts of protein. PrgX was pre- incubated with DMF and cCF10 for 5 minutes before addition of probes. **(A)** DNA template has only the XBS1 binding site. Lanes 1 and 5 are probes alone. PrgX concentration used: lanes 2 to 4 and lanes 6 to 8: 10, 25, and 100 nM respectively. **(B)** DNA template has only the XBS2 binding site. Lane 1 is the probe only. PrgX concentration used: lanes 2 to 5 and lanes 6 to 9: 10, 25, 100, and 200 nM respectively. Compare to Figure 8 of main text.

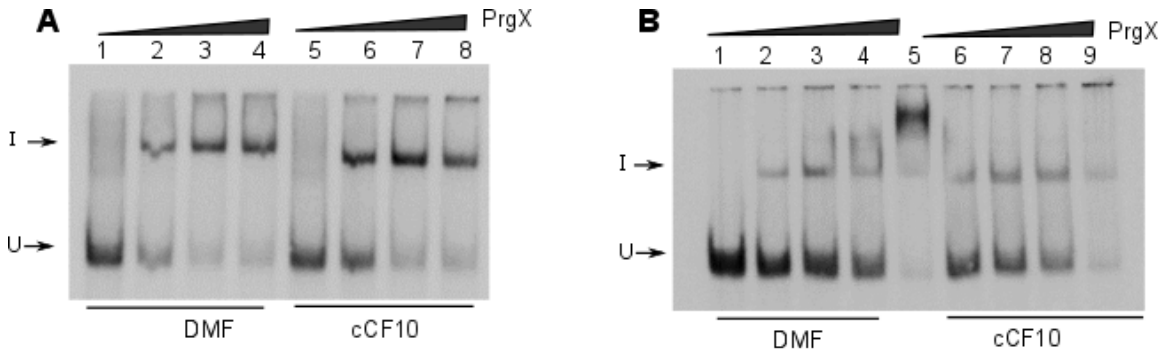

Supplement: MBO3-6-na-s001.pdf [file MBO3-6-na-s001.pdf]
